# Supplementary material for: Three isostructural MOFs based on different metal cations: proton conductivities and SC–SC transformation leading to magnetic changes
Source: Royal Society of Chemistry journal article supplement (doi:10.1039/d3ce00046j), 2023-01-01
Supplement: d3ce00046j5.pdf [file d3ce00046j5.pdf]

### Three isostructural MOFs based on different metal cations: proton conductivities and SC-SC transformation leading to magnetic changes

Huiqi Zou, Rongyun Li, Li Ding, Jing Lu\*, Haiquan Tian\*, Hui Yan, Suna Wang, Yunwu Li, Houting Liu\*

Shandong Provincial Key Laboratory of Chemical Energy Storage and Novel Cell Technology, School of Chemistry and Chemical Engineering, Liaocheng University, Liaocheng, Shandong, 252059 PR China; E-mail: [lujing@lcu.edu.cn](mailto:lujing@lcu.edu.cn); [tianhaiquan@lcu.edu.cn](mailto:tianhaiquan@lcu.edu.cn); [liuhouting@lcu.edu.cn](mailto:liuhouting@lcu.edu.cn).

Table S1 The selected bond lengths and angles of compounds **1-3** and **1**·CH<sub>3</sub>OH.

|                              |            |                     |            |
|------------------------------|------------|---------------------|------------|
| <b>1</b>                     |            |                     |            |
| Co(1)-O(5)#1                 | 1.998(3)   | Co(1)-O(3)#2        | 2.043(3)   |
| Co(1)-O(6)                   | 2.216(4)   | Co(1)-O(2)#2        | 2.270(3)   |
| Co(1)-O(4)                   | 2.013(3)   | Co(1)-O(7)          | 2.104(3)   |
| O(7)-Co(1)-O(6)              | 179.25(12) | O(4)-Co(1)-O(7)     | 88.00(14)  |
| O(4)-Co(1)-O(6)              | 91.31(13)  | O(6)-Co(1)-O(2)#2   | 94.82(12)  |
| O(7)-Co(1)-O(2)#2            | 85.92(13)  | O(5)#1-Co(1)-O(4)   | 109.43(13) |
| O(5)#1-Co(1)-O(4)            | 109.43(13) | O(5)#1-Co(1)-O(7)   | 91.67(14)  |
| O(4)-Co(1)-O(3)#2            | 102.90(13) | O(5)#1-Co(1)-O(6)   | 88.29(14)  |
| O(3)#2-Co(1)-O(7)            | 93.61(14)  | O(5)#1-Co(1)-O(3)#2 | 147.39(14) |
| O(3)#2-Co(1)-O(6)            | 86.82(13)  | O(5)#1-Co(1)-O(2)#2 | 88.05(12)  |
| O(3)#2-Co(1)-O(2)#2          | 60.33(11)  | O(4)-Co(1)-O(2)#2   | 161.67(12) |
| <b>1</b> ·CH <sub>3</sub> OH |            |                     |            |
| Co(1)-O(5)                   | 2.018(4)   | Co(1)-O(6)#1        | 2.025(5)   |
| Co(1)-O(1)                   | 2.103(6)   | Co(1)-O(2)          | 2.112(6)   |
| Co(1)-O(3)#2                 | 2.129(5)   | Co(1)-O(4)#2        | 2.220(4)   |
| O(5)-Co(1)-O(1)              | 86.9(2)    | O(5)-Co(1)-O(6)#1   | 116.2(2)   |
| O(5)-Co(1)-O(2)              | 89.3(2)    | O(6)#1-Co(1)-O(1)   | 84.2(2)    |
| O(1)-Co(1)-O(2)              | 171.2(2)   | O(6)#1-Co(1)-O(2)   | 90.5(2)    |
| O(6)#1-Co(1)-O(3)#2          | 153.13(18) | O(5)-Co(1)-O(3)#2   | 90.72(18)  |
| O(2)-Co(1)-O(3)#2            | 90.4(2)    | O(1)-Co(1)-O(3)#2   | 97.5(2)    |
| O(6)#1-Co(1)-O(4)#2          | 93.29(17)  | O(5)-Co(1)-O(4)#2   | 150.03(19) |
| O(2)-Co(1)-O(4)#2            | 96.3(2)    | O(1)-Co(1)-O(4)#2   | 91.0(2)    |
| <b>2</b>                     |            |                     |            |
| Mn(1)-O(5)                   | 2.053(11)  | Mn(1)-O(2)#2        | 2.355(10)  |

|                     |          |                     |           |
|---------------------|----------|---------------------|-----------|
| Mn(1)-O(4)#1        | 2.118(9) | Mn(1)-O(7)          | 2.206(11) |
| Mn(1)-O(3)#2        | 2.184(9) | Mn(1)-O(6)          | 2.232(11) |
| O(5)-Mn(1)-O(3)#2   | 97.9(4)  | O(5)-Mn(1)-O(4)#1   | 117.9(4)  |
| O(4)#1-Mn(1)-O(3)#2 | 144.2(4) | O(4)#1-Mn(1)-O(7)   | 86.9(4)   |
| O(5)-Mn(1)-O(7)     | 88.5(4)  | O(3)#2-Mn(1)-O(7)   | 93.8(4)   |
| O(7)-Mn(1)-O(2)#2   | 89.8(4)  | O(7)-Mn(1)-O(6)     | 177.7(4)  |
| O(5)-Mn(1)-O(2)#2   | 155.1(4) | O(4)#1-Mn(1)-O(2)#2 | 86.7(4)   |
| O(3)#2-Mn(1)-O(6)   | 88.3(4)  | O(5)-Mn(1)-O(6)     | 92.4(4)   |
| O(6)-Mn(1)-O(2)#2   | 90.3(4)  | O(4)#1-Mn(1)-O(6)   | 90.8(4)   |
| 3                   |          |                     |           |
| Zn(1)-O(2)#1        | 1.968(5) | Zn(1)-O(4)          | 1.973(4)  |
| Zn(1)-O(3)#2        | 2.005(5) | Zn(1)-O(7)          | 2.102(6)  |
| Zn(1)-O(6)          | 2.224(6) | Zn(1)-O(5)#2        | 2.448(6)  |
| O(2)#1-Zn(1)-O(3)#2 | 141.5(2) | O(2)#1-Zn(1)-O(4)   | 113.2(2)  |
| O(2)#1-Zn(1)-O(7)   | 92.8(2)  | O(4)-Zn(1)-O(3)#2   | 105.1(2)  |
| O(3)#2-Zn(1)-O(7)   | 91.0(2)  | O(4)-Zn(1)-O(7)     | 88.6(2)   |
| O(4)-Zn(1)-O(6)     | 90.4(2)  | O(2)#1-Zn(1)-O(6)   | 88.8(2)   |
| O(7)-Zn(1)-O(6)     | 178.4(2) | O(3)#2-Zn(1)-O(6)   | 88.0(2)   |
| O(4)-Zn(1)-O(5)#2   | 160.8(2) | O(2)#1-Zn(1)-O(5)#2 | 85.29(19) |
| O(7)-Zn(1)-O(5)#2   | 85.3(2)  | O(6)-Zn(1)-O(5)#2   | 95.3(2)   |

对称操作码：#1 -x+1,-y+1,-z+1；#2 -x+1,-y+1,-z.

**Table S2** Co<sup>II</sup> geometry analysis of **1** and **1**·CH<sub>3</sub>OH by SHAPE 2.1 software.

| Compound 1 |                               |        |                                             |       | Compound 1·CH <sub>3</sub> OH   |       |                                      |        |                                                     |
|------------|-------------------------------|--------|---------------------------------------------|-------|---------------------------------|-------|--------------------------------------|--------|-----------------------------------------------------|
| HP-6       |                               | 32.070 |                                             |       | 32.694                          |       |                                      |        |                                                     |
| PPY-6      |                               | 20.821 |                                             |       | 20.870                          |       |                                      |        |                                                     |
| OC-6       |                               | 2.745  |                                             |       | 3.537                           |       |                                      |        |                                                     |
| TPR-6      |                               | 10.332 |                                             |       | 8.718                           |       |                                      |        |                                                     |
| JPPY-5     |                               | 24.584 |                                             |       | 25.017                          |       |                                      |        |                                                     |
| Lable      | Shape                         | Lable  | Shape                                       | Lable | Shape                           | Lable | Shape                                | Lable  | Shape                                               |
| HP-6       | Hexagon<br>(D <sub>6h</sub> ) | PPY-6  | Pentagonal<br>pyramid<br>(C <sub>5v</sub> ) | OC-6  | Octahedron<br>(O <sub>h</sub> ) | TPR-6 | Trigonal prism<br>(D <sub>3h</sub> ) | JPPY-5 | Johnson<br>pentagonal<br>pyramid (C <sub>5v</sub> ) |

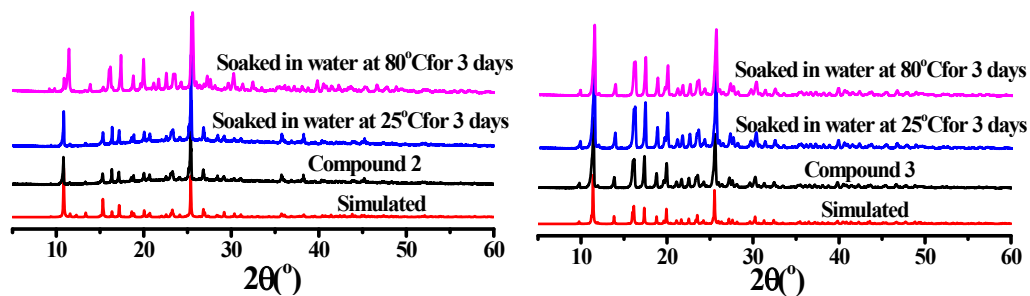

Fig. S1 Simulated (red), experimental (black), and water-treated (blue and purple) PXR D patterns of compounds 2 and 3.

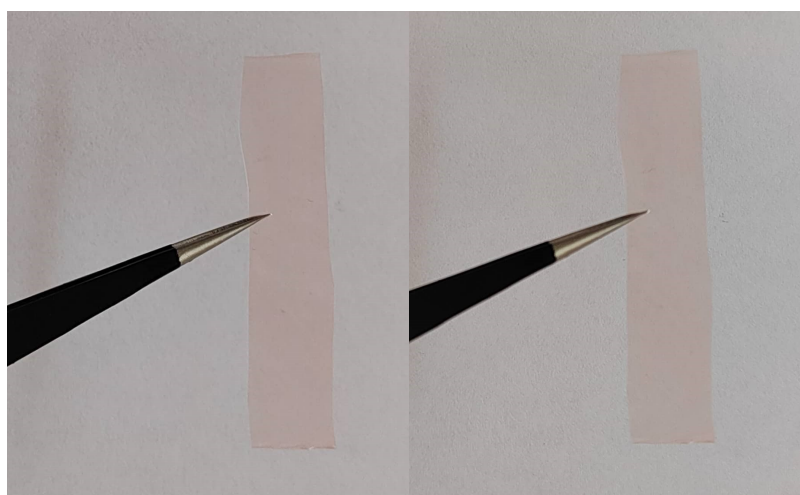

Fig. S2 The appearances of composite 1/Nafion membranes before and after the proton conductivity studies.

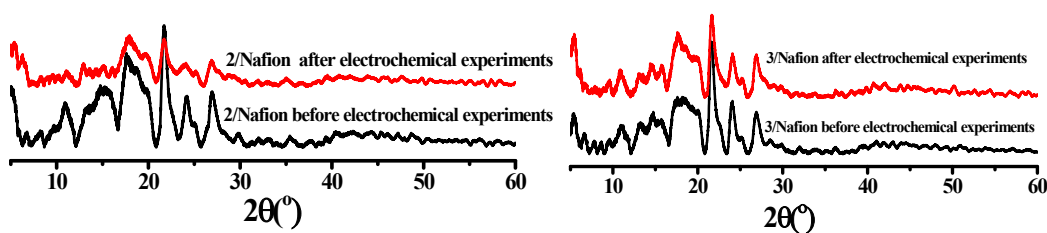

Fig. S3 The PXR D patterns of 2/Nafion and 3/Nafion composite membranes before and after electrochemical experiments.

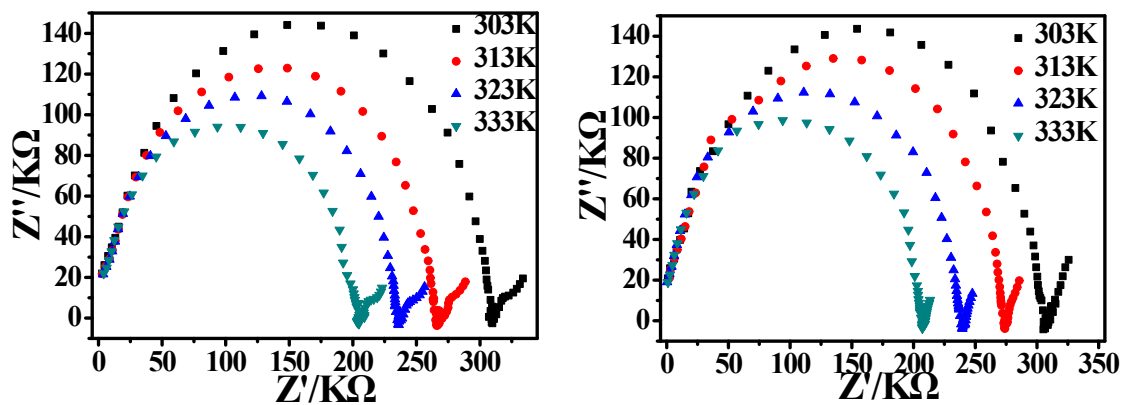

Fig. S4 The typical Nyquist plots of 2/Nafion and 3/Nafion at different temperature.

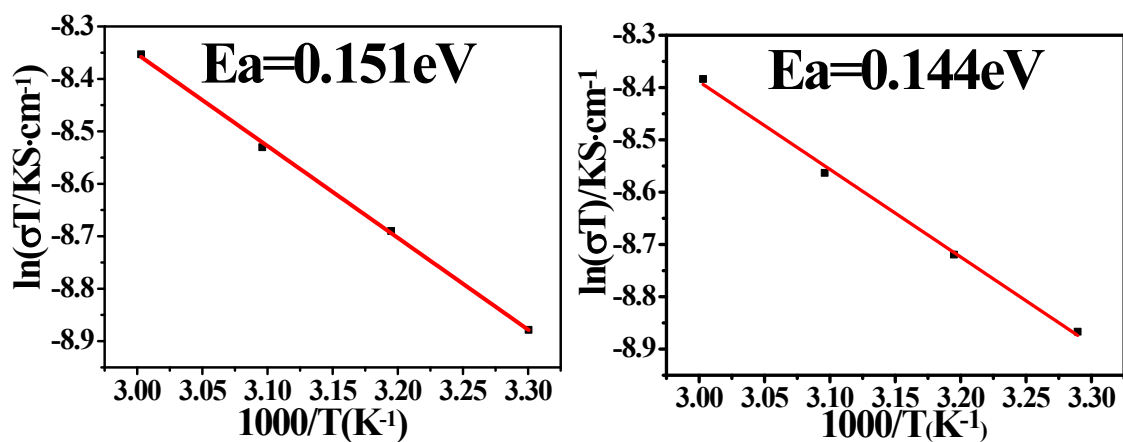

Fig. S5 The Arrhenius plots of proton conduction for 2/Nafion and 3/Nafion.
